# Supplementary material for: Identification of protective postexposure mycobacterial vaccine antigens using an immunosuppression-based reactivation model in the zebrafish
Source: Dis Model Mech. 2018 Mar 1;11(3):dmm033175. doi: 10.1242/dmm.033175 (PMC5897733; doi:10.1242/dmm.033175)
Supplement: Supplementary information [file dmm-11-033175-s1.pdf]

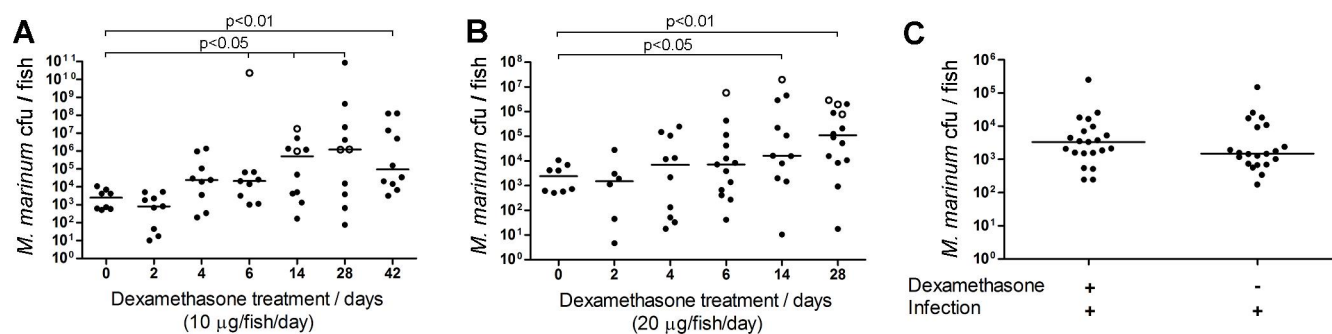

### Supplementary Figure 1. Dexamethasone treatment increases bacterial loads in zebrafish with a latent mycobacterial infection.

(A) Zebrafish with a latent *M. marinum* infection were treated with dexamethasone 10 µg/fish/day (A) or 20 µg/fish/day (B) for indicated times. Each dot shows the bacterial count in one fish (n=8-14 fish/group). (C) The fish were treated with dexamethasone (10 µg/fish/day) for four weeks prior to a low dose *M. marinum* infection. The bacterial burden was quantified 4 weeks post infection. Horizontal lines represent the median bacterial count of each group. p values were calculated using the one-tailed Mann-Whitney test.

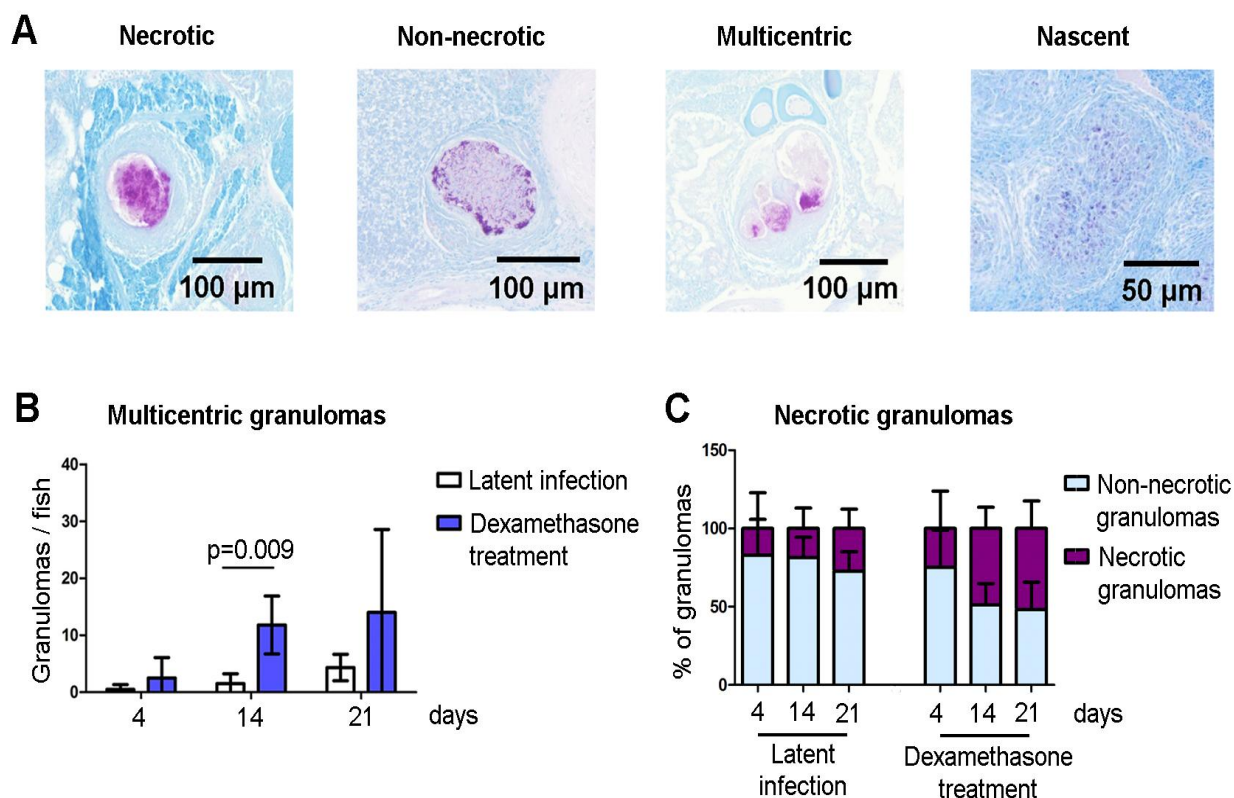

**Supplementary Figure 2. Dexamethasone treatment increases the number of multicentric granulomas and the relative proportion of necrotic granulomas.**

(A) Classification of different types of granulomas with Ziehl-Neelsen staining used for the quantification in Figure 2 and in this figure. (B) Quantification of multicentric granulomas per fish in a latent infection compared to a dexamethasone treatment. The bars show mean  $\pm$  s.d. (n=3-6 fish/group). (C) The proportion of necrotic and non-necrotic granulomas in a latent infection and after dexamethasone treatment (n=3-6 fish/group). Bars show the mean percentage  $\pm$  s.d. p values are calculated with two-way ANOVA.

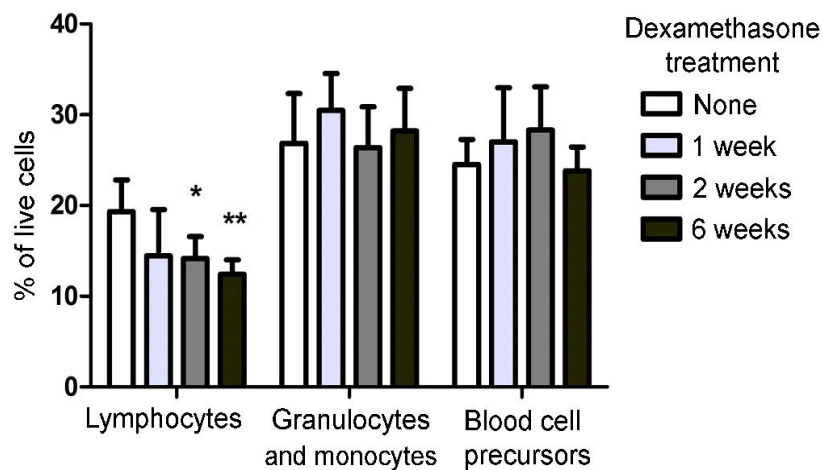

**Supplementary Figure 3. Dexamethasone treatment decreases the relative amount of lymphocytes in the zebrafish kidney, but does not affect the granulocyte and monocyte or blood cell precursor populations.**

Quantification of cell populations in the zebrafish kidney by FACS analysis following a dexamethasone treatment for 1, 2 and 6 weeks.  $n=7-9$  fish/group. Data is presented as mean  $\pm$ s.d. The data was analyzed with two-way ANOVA with Bonferroni's posttest, \*  $p<0.05$ , \*\*  $p<0.01$ .

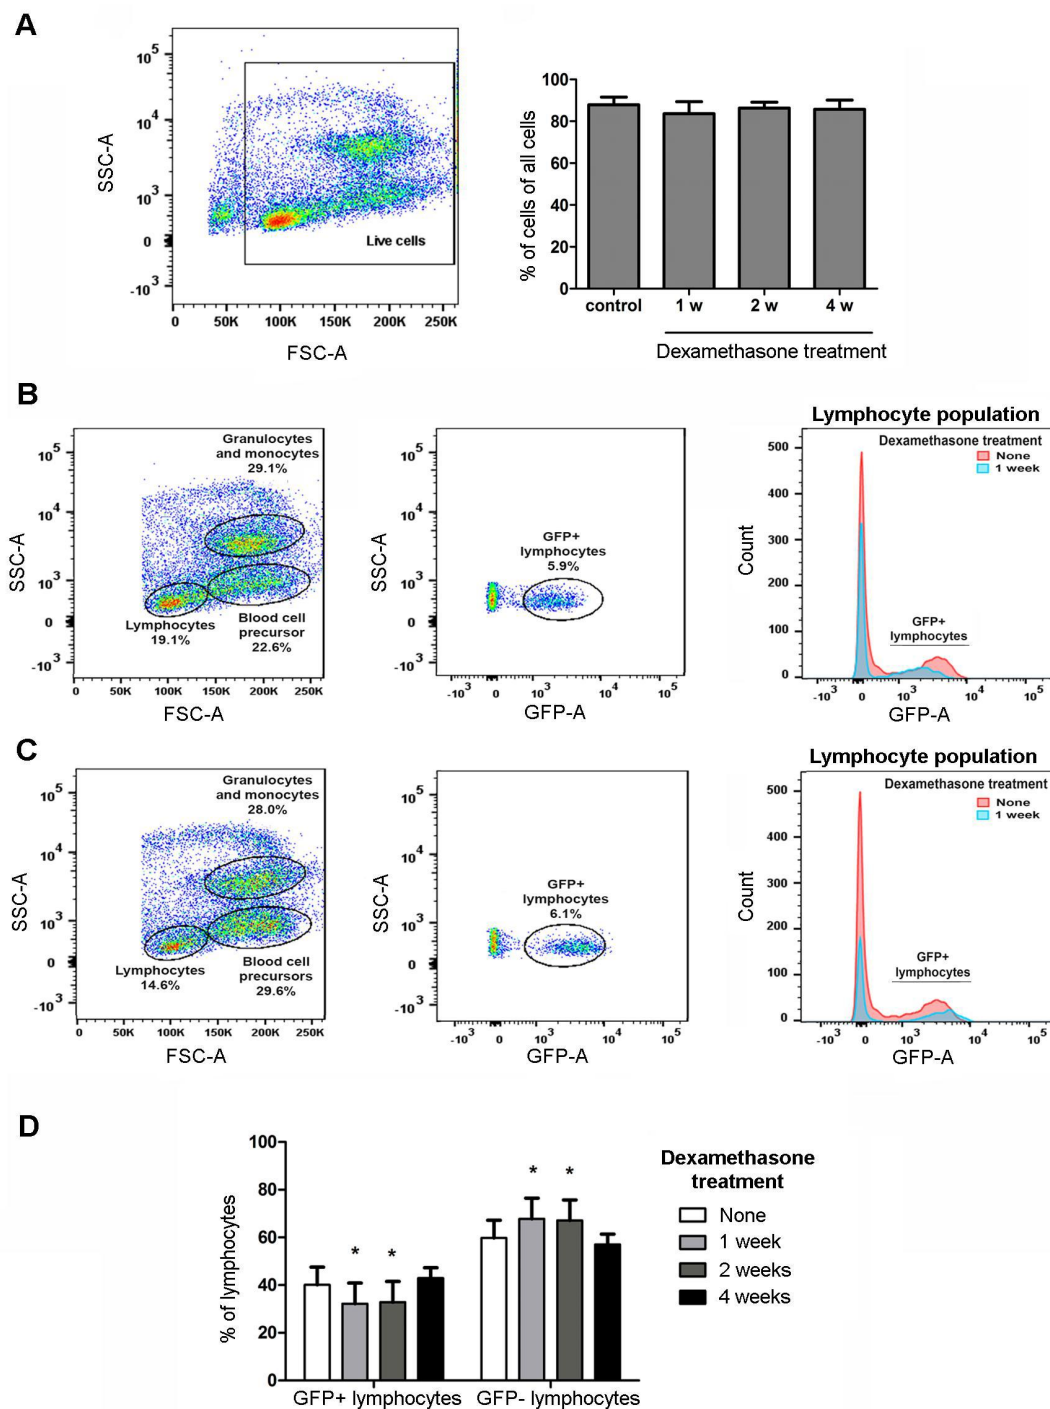

**Supplementary Figure 4. Dexamethasone treatment does not affect the number of live cells in the zebrafish kidney or their gating, but has a mild effect on the proportion of GFP+ and GFP- lymphocytes.**

A) The cells in the live gate were included in the FACS analysis and their number remained constant during a dexamethasone treatment. B and C) Gating of the kidney cells based on size (SSC-A) and granularity (FSC-A) and GFP expression after two (B) and four (C) weeks of a dexamethasone treatment. C) The relative proportion of GFP+ lymphocytes decreases during the first two weeks of a dexamethasone treatment, but is restored to the level of untreated fish by four weeks.  $n=12$ . Data is presented as mean $\pm$ s.d. The data was analyzed with two-way ANOVA with Bonferroni's posttest, \*  $p<0.05$ , \*\*  $p<0.01$ , \*\*\*  $p<0.001$ .

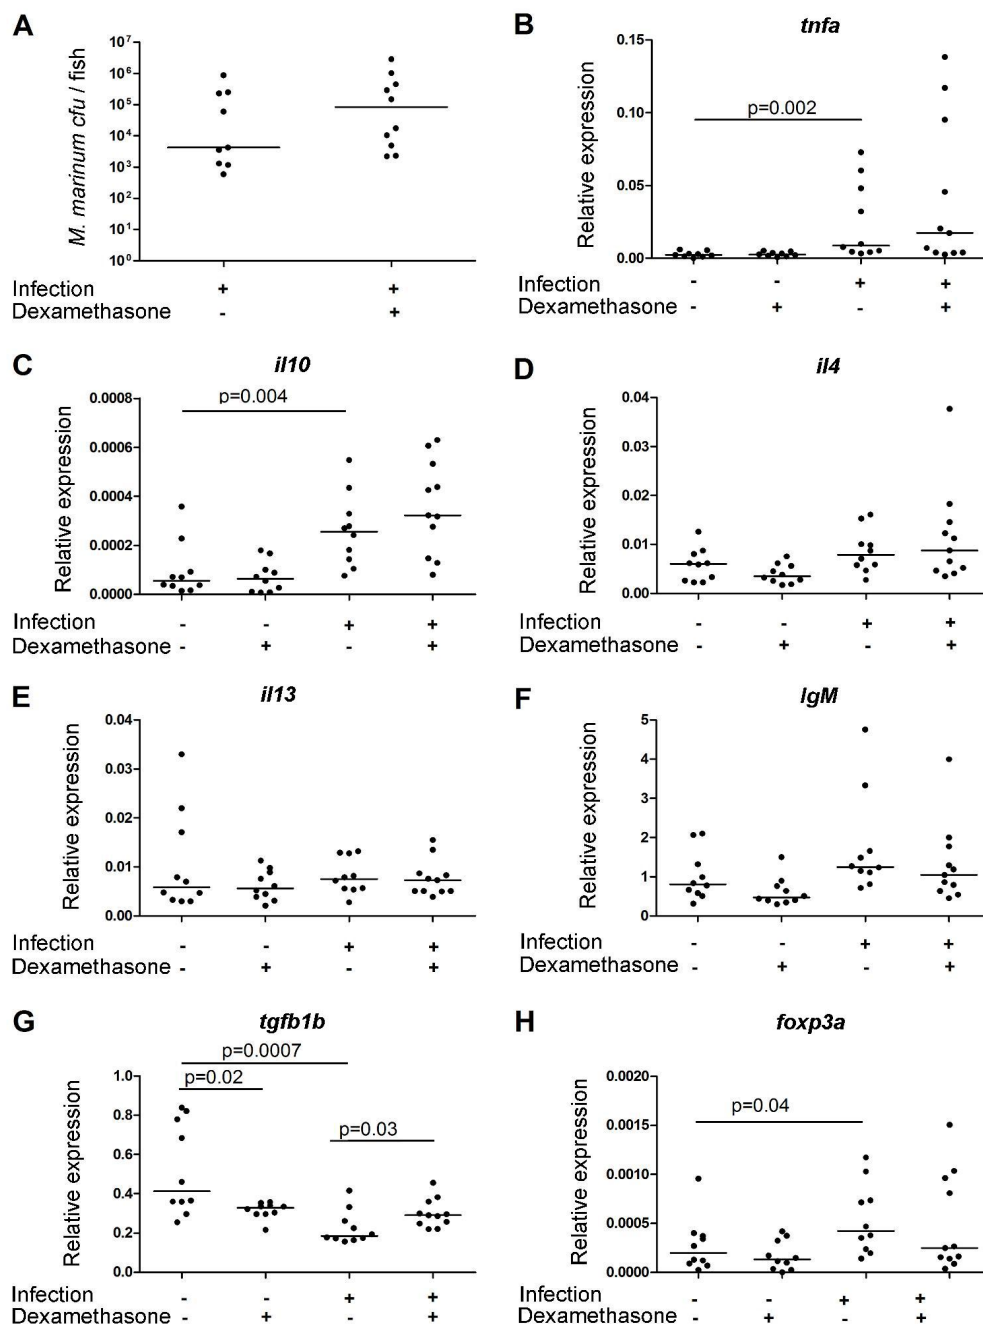

**Supplementary figure 5. Mycobacterial infection increases the expression level of *tnfa* and *il10* and a dexamethasone treatment increases the expression of *tgfb1b* upon infection.**

(A) The bacterial burden per fish in a latent infection and after a one-week dexamethasone treatment. Horizontal lines are median values of each group (n=9-10 fish/group). (B –H) Relative expression levels of cytokines and lymphocyte markers in zebrafish kidneys. Expression levels were normalized with the expression level of *ef1a*. Horizontal lines show median values of each group (n=9-10 fish/group). p values were calculated using the two-tailed Mann-Whitney test. (B) *tnfa*, (C) *il10*, (D) *il4*, (E) *il13*, (F) *IgM*, (G) *tgfb1b*, (H) *foxp3a*.

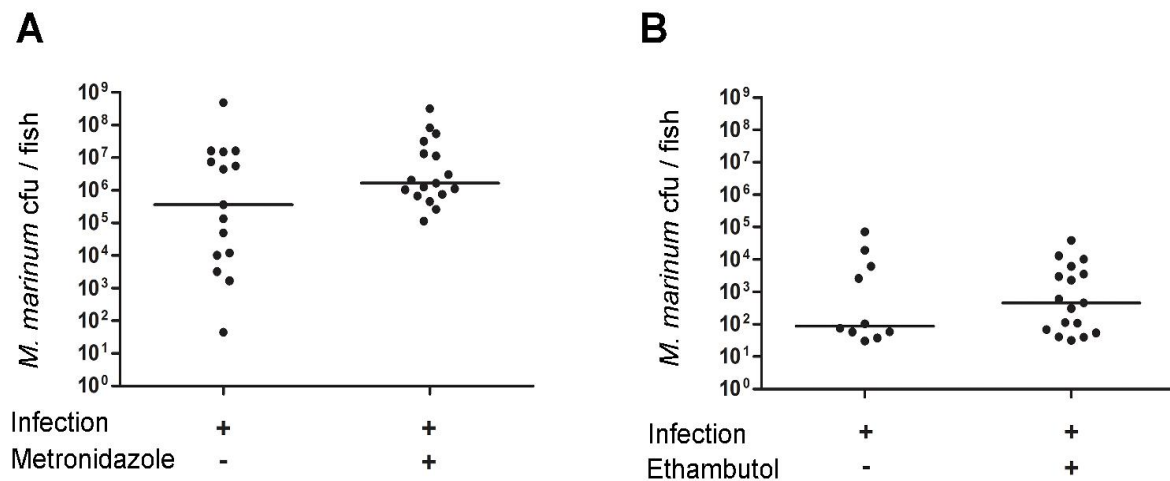

**Supplementary Figure 6. Metronidazole and ethambutol treatment against a latent mycobacterial infection in adult zebrafish.**

(A) Fish with a latent mycobacterial infection were treated three weeks with metronidazole (50  $\mu$ g/fish/day), and (B) two weeks with ethambutol (50  $\mu$ g/fish/day). Each dot represents the bacterial count in one fish. Horizontal lines show the median value of each group.  $n=10-15$  fish/group. The two-tailed Mann-Whitney test was used for the statistical analysis.
